# Supplementary material for: Parameterized minimum eddy diffusivity in WRF-Chem(v3.9.1.1) for improving PM 2.5 simulation in the stable boundary layer over eastern China
Source: Copernicus journal article supplement (doi:10.5194/egusphere-2023-1089), 2023-06-09
Supplement: Supplementary file 1 [file egusphere-2023-1089-supplement.pdf]

# Supplement of

## Parameterized minimum eddy diffusivity for improving PM<sub>2.5</sub> simulation in the stable boundary layer over eastern China

Wen Lu<sup>1,2,3</sup>, Bin Zhu<sup>1,2,3\*</sup>, Shuqi Yan<sup>4</sup>, Jie Li<sup>5,6</sup>, Zifa Wang<sup>5,6</sup>

Correspondence to: Bin Zhu (binzhu@nuist.edu.cn)

**Table S1.** Mean model performance metrics for PM<sub>2.5</sub> in different fixed value of Kzmin in NCP and YRD. The available values are marked in red.

| Region    | Case_name        | MB           | IOA         | RMSE         | R           |
|-----------|------------------|--------------|-------------|--------------|-------------|
| NCP       | Kzmin=0.01       | 57.99        | 0.76        | 89.32        | 0.73        |
|           | Kzmin=0.3        | 20.87        | 0.85        | 59.63        | 0.77        |
|           | Kzmin=0.5        | 12.92        | 0.86        | 55.4         | 0.78        |
|           | <b>Kzmin=0.8</b> | <b>4.9</b>   | <b>0.87</b> | <b>52.51</b> | <b>0.78</b> |
|           | <b>Kzmin=1.0</b> | <b>0.9</b>   | <b>0.87</b> | <b>51.67</b> | <b>0.78</b> |
|           | <b>Kzmin=1.3</b> | <b>-3.96</b> | <b>0.86</b> | <b>51.36</b> | <b>0.78</b> |
|           | Kzmin=1.5        | -6.67        | 0.86        | 51.53        | 0.78        |
|           | Kzmin=1.8        | -10.16       | 0.85        | 52.12        | 0.78        |
| Kzmin=2.0 | -12.21           | 0.84         | 52.66       | 0.77         |             |
| YRD       | Kzmin=0.01       | 37.77        | 0.71        | 69.01        | 0.71        |
|           | Kzmin=0.3        | 28.38        | 0.76        | 57.45        | 0.74        |
|           | Kzmin=0.5        | 25.82        | 0.78        | 54.91        | 0.74        |
|           | Kzmin=0.8        | 21.42        | 0.79        | 53.68        | 0.74        |
|           | <b>Kzmin=1.0</b> | <b>19.34</b> | <b>0.82</b> | <b>51.44</b> | <b>0.74</b> |
|           | <b>Kzmin=1.3</b> | <b>17.58</b> | <b>0.82</b> | <b>48.67</b> | <b>0.74</b> |
|           | <b>Kzmin=1.5</b> | <b>13.67</b> | <b>0.82</b> | <b>44.09</b> | <b>0.73</b> |
|           | Kzmin=1.8        | 11.11        | 0.81        | 42.31        | 0.72        |
| Kzmin=2.0 | 9.56             | 0.80         | 41.33       | 0.71         |             |

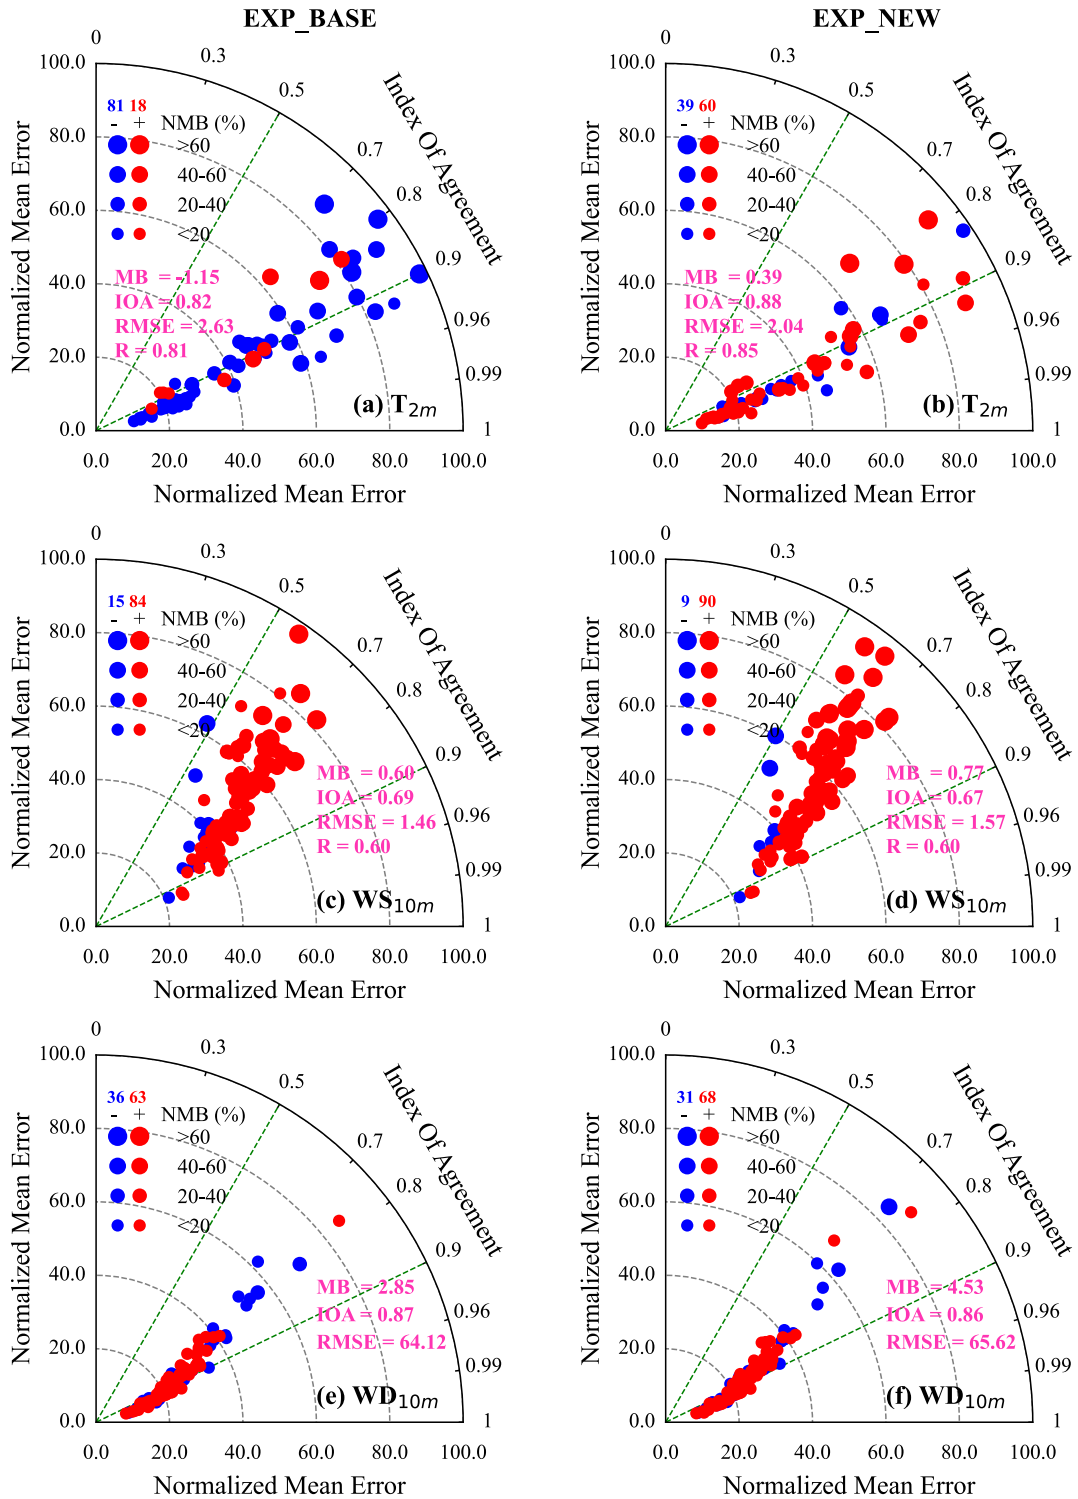

**Figure S1.** Taylor diagram for displaying model performance metrics on 99 meteorological stations in EXP\_BASE: (a)  $T_{2m}$  (unit:  $^{\circ}\text{C}$ ); (c)  $WS_{10m}$  (unit:  $\text{m}\cdot\text{s}^{-1}$ ); (e)  $WD_{10m}$  (unit:  $^{\circ}$ ) and EXP\_NEW: (b)  $T_{2m}$  (unit:  $^{\circ}\text{C}$ ); (d)  $WS_{10m}$  (unit:  $\text{m}\cdot\text{s}^{-1}$ ); (f)  $WD_{10m}$  (unit:  $^{\circ}$ ). The radial distance from the origin, the azimuthal position and the size of dots represent the values NME, IOA, and NMB of each station, respectively.
