# Supplementary material for: Parameterized minimum eddy diffusivity in WRF-Chem(v3.9.1.1) for improving PM 2.5 simulation in the stable boundary layer over eastern China
Source: Copernicus journal article supplement (doi:10.5194/egusphere-2023-1089), 2023-06-09
Supplement: Supplementary file [file egusphere-2023-1089-AC1-supplement.pdf]

Dear editor and reviewers,

Thank you for giving us the opportunity to revise our manuscript (Manuscript Number: egusphere-2023-1089). We appreciate your constructive comments and detail suggestions, which we have studied carefully while making appropriate revisions on the manuscript. We believe that under your guidance, our manuscript has been substantially improved.

In the following, the reviewer's comments/suggestions are highlighted by gray. The symbol ">>" quotes the original texts in the manuscript. Followed by the comments are our responses in plain text, as well as the respective revisions in the manuscript. Some important revisions are marked with red font.

Thank you again for your constructive comments and suggestions.

Yours sincerely,

Wen Lu, Bin Zhu, and all co-authors.

### Replies to Reviewer

This article proposes a parametrization for the diagnostic of a minimum value of eddy diffusivity. The goal is to improve the modelling of PM<sub>2.5</sub> in the stable boundary layer. The scheme is applied to a test case in China with the WRF-Chem regional meteorological model. They diagnosed that model generally underestimates weak turbulence in the nocturnal stable boundary layer leading to an overestimation of surface aerosol concentrations. To parameterize this Kzmin, they propose to use the sensible H and latent LE heat fluxes. The additional term increases the Kzmin value and enables to reduce significantly their model bias. They show that their change includes a spatial variability of the Kzmin, depending on the landuse and the meteorology. A latitudinal effect is diagnosed.

Thank you for investing the time to review our paper. We are very glad to receive your pertinent proposals. We think your suggestions and comments have greatly improved our manuscript in science and technical details.

### General Comments

#### Comment 1:

The fact to consider that all models overestimate surface concentrations of particles is not correct. It is the specific case of this model WRF-chem. But there is no systematic tendency about this point. If the authors are sure of that, please provide the bibliography, a review article.

Thank you for this valuable suggestion. The statement that all models overestimate surface PM<sub>2.5</sub> concentration in stable boundary layer (SBL) should be arbitrary from a global view, which only related to the specified region for the most cases, eg. in eastern China. We did not find a systematic review article which have evaluated model performance of particles in SBL in eastern China. However, many scholars have reported the overestimation of PM<sub>2.5</sub> in eastern China, especially in SBL condition (WRF-Chem: Du et al., 2020, Jia et al., 2021, Qiu et al., Wang et al., 2021; WRF-NAQPMS: Chen, 2022; WRF-CMAQ: Liu et al., 2023). The meteorological conditions for these models are all provided by the WRF model. Therefore, here, we focused the common overestimates of the particle concentration in SBL in eastern China by WRF provided meteorological conditions, which could be related to the incorrectly simulation of meteorological factors in SBL. In addition, we admit the reviewer's

point and found that there were some underestimates in other regions. For example, Zhang et al. (2020) used GEOS-Chem, WRF-Chem, and CMAQ to evaluate the model performance of PM<sub>2.5</sub> in north America. They found that all CTMs underestimate monthly mean PM<sub>2.5</sub> concentration compared with ground observations. In the conclusion, we add the potential uncertainty of PM<sub>2.5</sub> simulations in our research in the revised manuscript of line 312 to 317.

### **References and their related presentation:**

[1] Chen (2022). The numerical simulation of critical control process of aerosol vertical structure. [D]. Beijing: Institute of Atmospheric Physics, Chinese Academy of Sciences, 63-66.

[2] Du, Q., Zhao, C., Zhang, M., Dong, X., Chen, Y., Liu, Z., ... & Miao, S. (2020). Modeling diurnal variation of surface PM<sub>2.5</sub> concentrations over East China with WRF-Chem: Impacts from boundary-layer mixing and anthropogenic emission. *Atmospheric Chemistry and Physics*, 20(5), 2839-2863.

*In page 7: the CTM1 experiment can generally capture the diurnal variation of the DI of surface PM<sub>2.5</sub> in the four cities, but overestimates the DI in the night, particularly in spring and autumn.*

[3] Jia, W., Zhang, X., Zhang, H., & Ren, Y. (2021). Application of turbulent diffusion term of aerosols in mesoscale model. *Geophysical Research Letters*, 48(11), e2021GL093199.

*In page 4: In short, the overestimation of pollutant concentration is still a common problem, and it is worthy of research and discussion.*

[4] Qiu, Y., Liao, H., Zhang, R., & Hu, J. (2017). Simulated impacts of direct radiative effects of scattering and absorbing aerosols on surface layer aerosol concentrations in China during a heavily polluted event in February 2014. *Journal of Geophysical Research: Atmospheres*, 122(11), 5955-5975.

*In abstract: Comparisons of model results with observations showed that the WRF-Chem model reproduced the spatial and temporal variations of meteorological variables reasonably well but overestimated average PM<sub>2.5</sub> concentration by 21.7% over the NCP during 21–27 February.*

[5] Liu, M., Lin, J., Wang, Y., Sun, Y., Zheng, B., Shao, J., ... & Wu, Z. (2018). Spatiotemporal variability of NO<sub>2</sub> and PM<sub>2.5</sub> over Eastern China: observational and model analyses with a novel statistical method. *Atmospheric Chemistry and Physics*, 18(17), 12933-12952.

*In abstract: CMAQ overestimates the diurnal cycle of pollutants due to too-weak boundary layer mixing, especially in the nighttime, and overestimates NO<sub>2</sub> by about 30 ug·m<sup>-3</sup> and PM<sub>2.5</sub> by 60 ug·m<sup>-3</sup>.*

[6] Zhang, H., Wang, J., García, L. C., Ge, C., Plessel, T., Szykman, J., ... & Spero, T. L. (2020). Improving surface PM<sub>2.5</sub> forecasts in the United States using an ensemble of chemical transport model outputs: 1. Bias correction with surface observations in nonrural areas. *Journal of Geophysical Research: Atmospheres*, 125(14), e2019JD032293.

*In abstract: While all CTMs (CMAQ, WRF-Chem, GEOS-Chem) underestimate daily surface PM<sub>2.5</sub> mass concentration by 20–50%, KF correction is effective for improving each CTM forecast.*

### **In the last of our revised manuscript in Line 312-317:**

It is worth noting that is one kind of error compensation for enhance the underestimated turbulent diffusion under the stable boundary layer. In the absence of effective physical scheme in thermodynamics, it is an alternative choice. Although there have been many studies reporting the overestimation within the SBL in eastern China. However, models are not always overestimated in other countries and regions. Adaptation our scheme to other regions and other models needs to be further evaluated. In this study, winter pollution in eastern China was investigated and only one month of simulation was done, and simulations for other seasons need to be further evaluated.

## Comment 2:

But considering this is mostly a problem with this model, the fact to add a term to reduce this bias is a tuning. Except if the new term has a robust physical basis. For the moment, this additional  $K_{zmin}$  is able to unbiased the model, but it could be only an error compensation. Of course, it is always difficult to quantify but the authors should at least discuss this point and add more sensitivity tests: injection of anthropogenic emissions at levels higher than the surface level, test of boundary layer scheme to see the model sensitivity to the bias of  $T_{2m}$ , among others.

Thank you for this valuable suggestion. As you said,  $K_{zmin}$  is one kind of error compensation for the underestimated turbulent diffusion in the SBL and is difficult to quantify in thermodynamics. Therefore, in our original manuscript, we set a series of experiments with different fixed  $K_{zmin}$  value to obtain the reasonable  $K_{zmin}$  value ranges in eastern China. As your suggestion, more experiments were tested. The first series experiments are tested the sensitivity of  $PM_{2.5}$  to different inject height. In our study, the anthropogenic emission inventory that we used is MEIC (in China) and MIX (east Asia that excluding China). MEIC and MIX are divided into five sector emission, including (power, residential, transportation, residential and industry emission). Two experiments were set to compare the effects of emission inject height:

1. EXP\_H7: According to the vertical emission ratio profile suggestion by MEIC, residential, transport and residential emission were emitted to the first level in the model. For power emission, it was emitted from about 61-550m (level 2 to level 7). For the industry emission, it was emitted from 18m-116m (level 1 to level 3).

2. EXP\_H2: The residential, transportation, industry and residential emission were emitted into the first level in the model. For power emission, it was emitted into the second level.

The emission inject height of different sector source was shown in Figure R1 and the mean model performance of the  $PM_{2.5}$  simulation was shown in Table R1. The simulation result of  $PM_{2.5}$  is much better in EXP\_H7, which primary pollutant was emitted to higher altitudes. However, the result in EXP\_H7 was still overestimated. Our EXP\_BASE experiment used the same emission inject heights as EXP\_H7. Therefore, we believe we need to consider the other ways to improve the overestimation of  $PM_{2.5}$ .

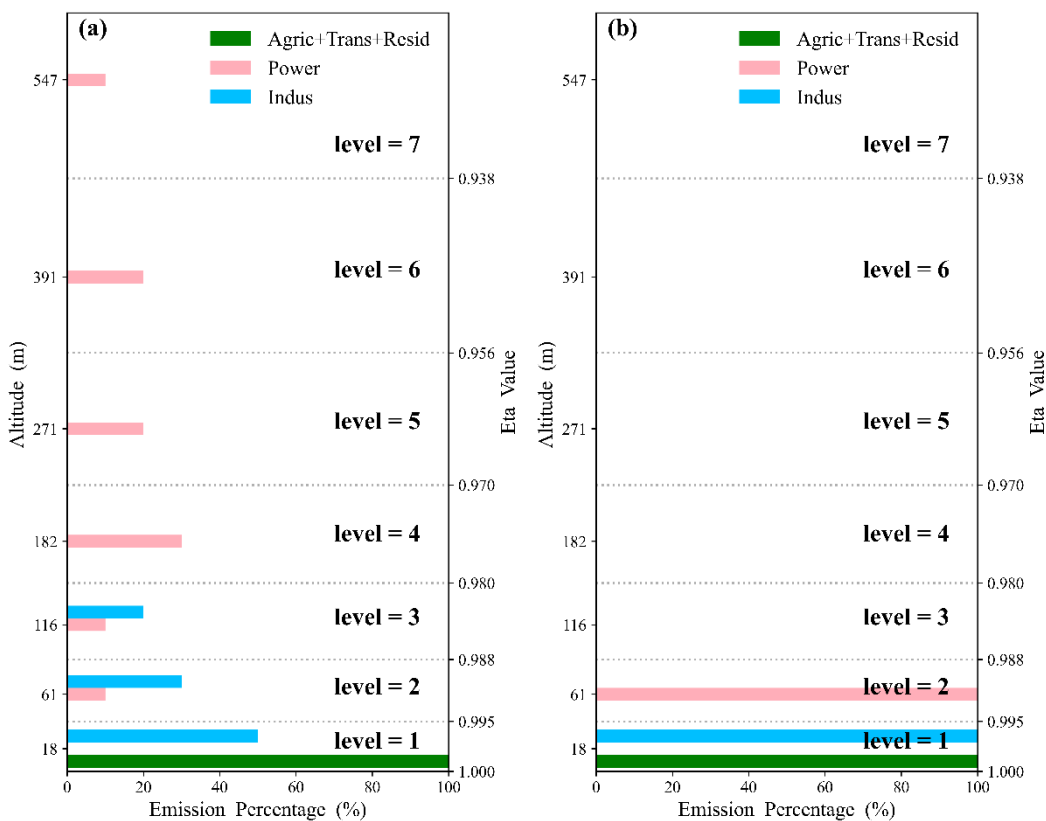

Figure R1. The emission percentage (%) in two experiment.

**Table R1.** Mean model performance metrics for and PM<sub>2.5</sub> (nighttime) in different emission inject height.

| Case_name | MB    | IOA  | RMSE  | R    |
|-----------|-------|------|-------|------|
| EXP_H7    | 48.23 | 0.72 | 82.68 | 0.66 |
| EXP_H2    | 60.34 | 0.7  | 91.11 | 0.62 |

You may be interested in the sensitivity of boundary layer scheme to the bias of T<sub>2m</sub>. The incorrect T<sub>2m</sub> simulation has also received previous attention. Hu et al., (2010) has tested three boundary layers (YSU, MYJ, ACM2) to see the model sensitivity to the bias of T<sub>2m</sub> by WRF model. They indicated that the use of the local-closure MYJ scheme produces the largest bias. The YSU PBL scheme produces higher temperatures than with the other two schemes during nighttime in the lower atmosphere. Jia et al. (2023) found that the differences in simulated temperatures between the nonlocal scheme mainly originate from downward shortwave radiation, while the simulation differences in local closure PBL schemes may be related to the simulated difference in sensible heat flux. In general, the simulation of T<sub>2m</sub> still needs to be improved, and we will focus on it in future.

### Reference

Hu, X. M., Nielsen-Gammon, J. W., & Zhang, F. (2010). Evaluation of three planetary boundary layer schemes in the WRF model. *Journal of Applied Meteorology and Climatology*, 49(9), 1831-1844.

Jia, W., Zhang, X., Wang, H., Wang, Y., Wang, D., Zhong, J., Zhang, W., Zhang, L., Guo, L., Lei, Y., Wang, J., Yang, Y., and Lin, Y.: Comprehensive evaluation of typical planetary boundary layer (PBL) parameterization schemes in China. Part I: Understanding expressiveness of schemes for different regions from the mechanism perspective, *Geosci. Model Dev. Discuss.* [preprint], <https://doi.org/10.5194/gmd-2023-30>, in review, 2023.

### Comment 3:

A detailed analysis based on hourly time-series and comparison to surface observation of PM<sub>2.5</sub> is also missing to really see if there is a physically improvements of the surface concentrations with this scheme. Ideally, lidar data could help to see if the vertical structure of aerosols is better reproduced by the model.

Thank you for this valuable suggestion. We are apologized for not providing the hourly time-series to show our improved results. Here, we provide the results in supplement Figure S3. The simulation of four cities (2 north cities in north; 2 cities in south) was used to demonstrate the improvements. They are Zhengzhou (34.75°N, 113.64°E); Jining (35.43°N, 116.63°E) in north of China and Hefei (31.94°N, 117.27°E); Nanjing (32.2°N, 118.8°E) in YRD. There are three to four haze events (the concentration of PM<sub>2.5</sub> exceeds 115 ug·m<sup>-3</sup> and lasts for more than 48 hours, shaded in yellow) occurred in each city in December 2016. The overestimation of EXP\_BASE is obvious, especially during stable condition, e.g., during nighttime, and heavy pollution events. The model result in EXP\_NEW is improved by using our parameterized Kzmin and closer to the observation. The metrics such as MB and IOA has significant improvement (Figure S3). It's worth noting that both two schemes underestimate extreme high peak concentrations of PM<sub>2.5</sub> (such as Zhengzhou on 19 December, the concentration greater than 600 ug·m<sup>-3</sup>), which may be due to the poor ability to extreme heave pollution simulation in existing mesoscale models. The hourly time-series was added in the revised supplement Figure S2.

For the vertical structure of PM<sub>2.5</sub>, the field experiment data was used. The observation site is located in the northern suburbs of Nanjing. The coordinates and altitude of the observation site are 32.0°N, 118.4°E and approximately 23 m asl, respectively. The PM<sub>2.5</sub> concentrations were measured by a PDR-1500 fixed on an unmanned aerial vehicle (UAV) platform from December 27, 2016, to December 31, 2016. 10 profiles (surface to ~1.0km) of PM<sub>2.5</sub> in SBL were obtained for model evaluation in vertical. We have well evaluated the PM<sub>2.5</sub> observed by PDR-1500 (Zhu et al., 2019, Shi et al., 2021). The

improvement in the simulation on the surface is significant, and some underestimation periods in the high altitude is also improved. In general, the profile in EXP\_NEW is closer to the profile observed in the vertical. We are sorry we cannot get high quality PM<sub>2.5</sub> data retrieved from lidar, because they are observed in extinction coefficient and not well evaluated in high quality from individual maintain institutions. The picture was revised in Figure 4 of the revised manuscript.

**Reference:**

Shi, S., Zhu, B., Lu, W., Yan, S., Fang, C., Liu, X., ... & Liu, C. (2021). Estimation of radiative forcing and heating rate based on vertical observation of black carbon in Nanjing, China. *Science of The Total Environment*, 756, 144135.

Zhu, J., Zhu, B., Huang, Y., An, J., & Xu, J. (2019). PM<sub>2.5</sub> vertical variation during a fog episode in a rural area of the Yangtze River Delta, China. *Science of The Total Environment*, 685, 555-563.

**In the last of our revised supplement in Figure S2**

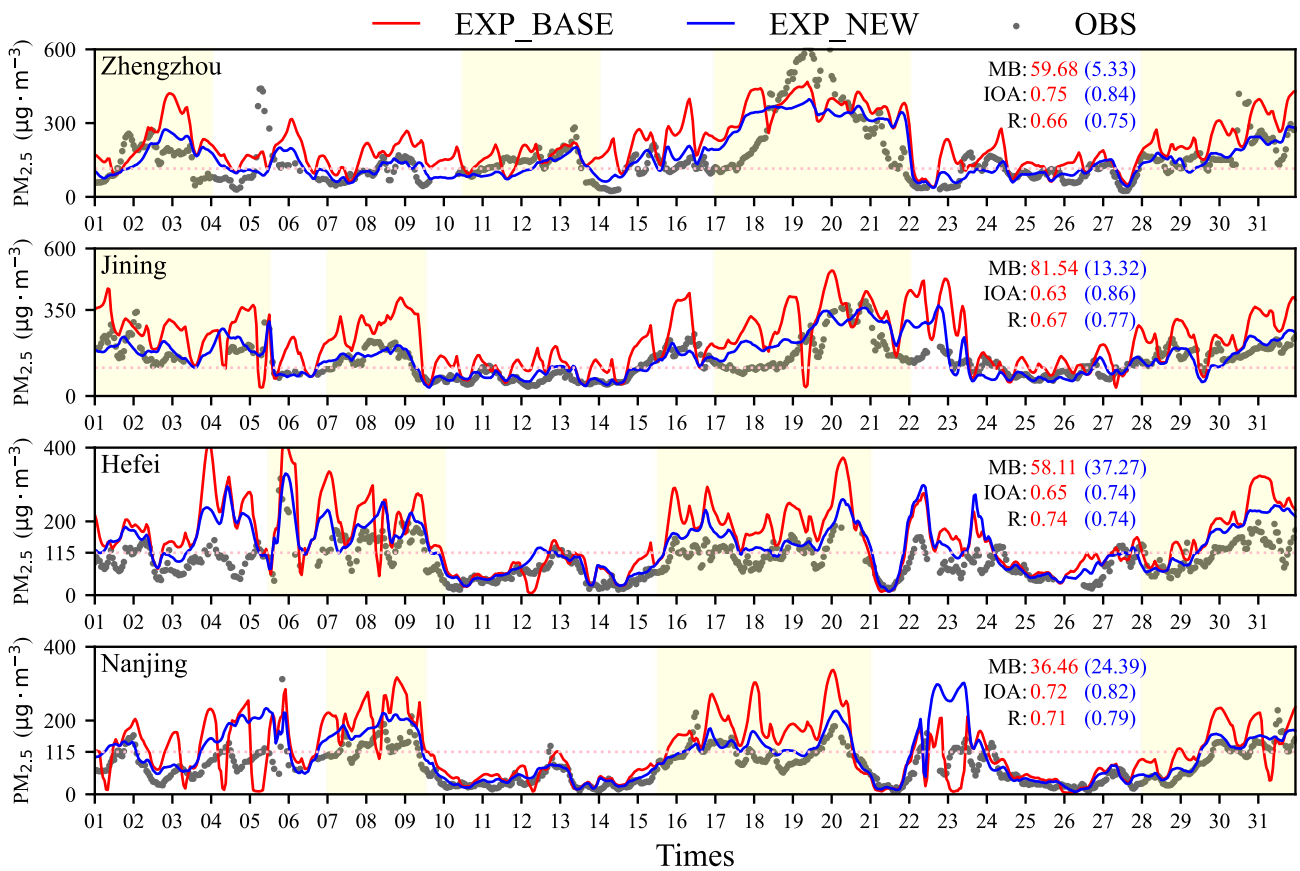

**Figure S2.** Time series of PM<sub>2.5</sub> concentration in Zhengzhou, Jining, Hefei and Nanjing in December 2016. The grey dots, red lines and blue lines represent the results of observation, EXP\_BASE and EXP\_NEW, respectively. The yellow shaded represent haze events (the concentration of PM<sub>2.5</sub> exceeds 115 µg·m<sup>-3</sup> and lasts for more than 48 hours) in each city. The metrics (MB, IOA and R) was calculated by the full day (daytime and nighttime) data.

**In the last of our revised manuscript in Figure 4**

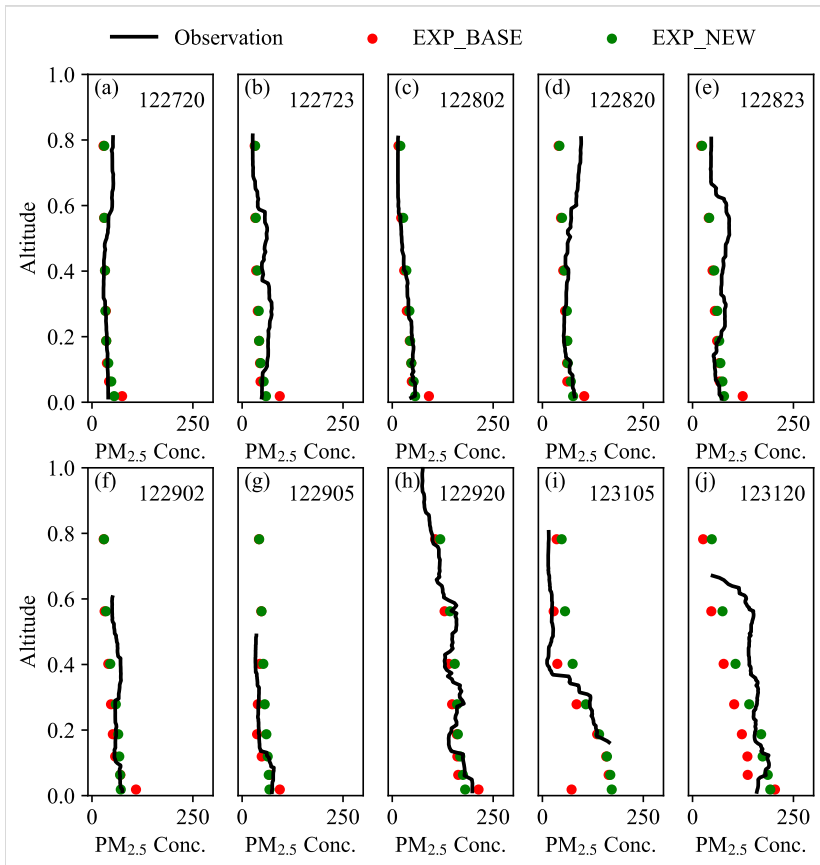

**Comment 4:**

Another question: the comparison is only performed for PM<sub>2.5</sub>. What about PM<sub>10</sub>? NO<sub>2</sub> and O<sub>3</sub> (often measured at stations)?  
 The bias on these species should be of interest to understand if the new Kzmin value is really better for all species.

We tested the simulation of PM<sub>10</sub> and two gases (O<sub>3</sub> and NO<sub>2</sub>). The mean model performance was shown in Table R2. As for PM<sub>10</sub>, EXP\_BASE overestimated the simulation, which is very similar to the PM<sub>2.5</sub>. The model performances of EXP\_NEW was better than EXP\_BASE with the smaller mean bias and larger IOA and R. For NO<sub>2</sub>, model overestimated the simulation in EXP\_BASE. EXP\_NEW decreased the simulation MB from 61.12  $\mu\text{g}\cdot\text{m}^{-3}$  to 34.95  $\mu\text{g}\cdot\text{m}^{-3}$  and increase IOA from 0.44 to 0.52. In general, the simulation result of PM<sub>10</sub> and NO<sub>2</sub> in EXP\_NEW are better than that in EXP\_BASE. While the simulation result is poor for O<sub>3</sub> than PM<sub>10</sub> and NO<sub>2</sub>, both in EXP\_BASE and EXP\_NEW, which may be related to the poor ability to simulate nighttime ozone in WRF-Chem model. Delightfully, EXP\_NEW decrease the mean bias from -19.49  $\mu\text{g}\cdot\text{m}^{-3}$  to -12.15  $\mu\text{g}\cdot\text{m}^{-3}$ . We will focus on the improvement of nighttime O<sub>3</sub> simulation in the future.

**Table R2.** Mean model performance metrics for PM<sub>2.5</sub>, O<sub>3</sub>, and NO<sub>2</sub> (nighttime).

| Species name     | Case_name | MB     | IOA  | RMSE  | R    |
|------------------|-----------|--------|------|-------|------|
| PM <sub>10</sub> | EXP_BASE  | 28.72  | 0.79 | 73.73 | 0.73 |
|                  | EXP_NEW   | -6.85  | 0.83 | 57.31 | 0.75 |
| NO <sub>2</sub>  | EXP_BASE  | 61.12  | 0.44 | 77.5  | 0.54 |
|                  | EXP_NEW   | 34.95  | 0.52 | 51.84 | 0.47 |
| O <sub>3</sub>   | EXP_BASE  | -19.49 | 0.5  | 27.22 | 0.27 |
|                  | EXP_NEW   | -12.15 | 0.5  | 27.19 | 0.2  |

## Specefic comments:

### Comment 1:

The abstract is clear and summarizes correctly the whole content of the study, although the last three sentences deserved to be reformulated.

» Line31-35: ... Process analysis showed that vertical mixing is the key process to improve PM<sub>2.5</sub> simulations on the surface in the revised scheme. The increase in the PM<sub>2.5</sub> concentration in the upper SBL was attributed to vertical mixing, advection, and aerosol chemistry. This study highlights the importance of improving turbulent diffusion in current mesoscale models under the SBL and has great significance for aerosol simulation research under heavy air pollution events.

Thank you for this valuable suggestion. The last three sentences have been reformulated in revised manuscript of line 31-34.

### In the last of our revised manuscript in Line 31-34:

... Process analysis showed that vertical mixing is the key process to improve the overestimation of surface PM<sub>2.5</sub> simulation under the SBL. This study suggests that a stronger turbulent diffusion is required in current mesoscale models to better simulate the surface PM<sub>2.5</sub> under the SBL.

### Comment 2:

Data and Metodology: Several data are used to validate the model's hypotheses made in this study. It includes vertical measurements, essential for this type of vertical mixing study. The model used is WRFchem, known as a fully coupled model. Unfortunately, the coupling is not always really activated, all options being not coupled. It is recommended to the authors to add in Appendix an explanation about their namelist to ensure that the coupling was really fully active. The choice in the namelist may completely change their results.

Thanks for your concerns. We are sure that the combination of our schemes is fully coupled. The aerosol feedback is already enabled in the namelist.input file. The detail of the physical and chemical parameterization schemes was added in the revised splement Table S2 and the namelist.input file was provided in the supplement.

### In the last of our revised manuscript in

#### Line 89-90:

... Other physical and chemical parameterization schemes was shown in Table S2.

### In the last of our revised supplement in

**Table S2.** Physical and chemical parameterization schemes.

| Scheme                     | Option                            |
|----------------------------|-----------------------------------|
| Boundary layer             | YSU (Hong et al., 2006)           |
| Microphysics               | Morrison (Morrison et al., 2009)  |
| Longwave radiation         | RRTMG (Iacono et al., 2008)       |
| Land surface               | Noah (Chen et al., 2001)          |
| Gas-phase chemistry        | CBM-Z (Zaveri et al., 1996)       |
| Aerosol chemistry          | MOSAIC-8bin (Zaveri et al., 2008) |
| Aerosol–radiation feedback | On                                |

### Comment 3:

The key point of the study is to assume that the 'evaporative fraction' (EF) may be used to characterize the searched value of  $K_{zmin}$ . Why not, but why exactly?

As shown in general comment 1, the overestimation of  $PM_{2.5}$  concentration under the SBL is common in eastern China which related to the underestimation of turbulence diffusion intensity. The poor simulated results of turbulent diffusion in SBL may be related to lacking of the full conceptual and theoretical understanding in SBL.  $K_{zmin}$  has no physical significance in YSU scheme of the original model, but is one kind of simply an error compensation for the lack of turbulent diffusion capacity for enhance the underestimated turbulent diffusion under the SBL. In the absence of effective physical scheme in thermodynamics, it is an alternative choice. Our work is to raise a reasonable dynamic  $K_{zmin}$  and apply it in eastern China for improvement the  $PM_{2.5}$  simulation under SBL. In the multiple fixed  $K_{zmin}$  value experiments (Table S1), the reasonable  $K_{zmin}$  value ranges was obtained for the north China plain (NCP) ( $0.8$  to  $1.3 \text{ m}^2 \cdot \text{s}^{-1}$ ) and YRD region ( $1.0$  to  $1.5 \text{ m}^2 \cdot \text{s}^{-1}$ ) of eastern China. Compared to the north region, the YRD needs a larger  $K_{zmin}$  value for  $PM_{2.5}$  simulation at SBL. Fortunately, EF can reflect the differences of physical characteristics between NCP and YRD, which related to the meteorological features of radiation, temperature, cloud, precipitation, underlying surface (soil moisture, L,H), etc. in different climate zones (Han et al., 2020, Jin et al., 2021). Also, we found the value of EF+1.0 was consistent with the distribution of the reasonable  $K_{zmin}$  value ranges in north and south regions of eastern China, showing in sensitive experiments (Table S1). Therefore, we intend to use EF+1.0 to parameterize the value of  $K_{zmin}$  for improving  $PM_{2.5}$  simulation over eastern China and the improvement was obvious for  $PM_{2.5}$  simulation in Section 3.1.

### Reference

Han, G., Wang, J., Pan, Y., Huang, N., Zhang, Z., Peng, R., ... & Pan, Z. (2020). Temporal and spatial variation of soil moisture and its possible impact on regional air temperature in China. *Water*, 12(6), 1807.

Jin, H., Chen, X., Wu, P., Song, C., & Xia, W. (2021). Evaluation of spatial-temporal distribution of precipitation in mainland China by statistic and clustering methods. *Atmospheric Research*, 262, 105772.

### Comment 4:

The end of the paragraph (lines 130 to 137) is not very clear and should be reworded. It means that under stable conditions, the values of  $K_{zmin}$  may be 100 times larger than under unstable conditions?

>> Line130-137: ... and the expression can be found in formula 1.

$$\text{under stable} : K_{zmin} = EF + 1.0 \quad (5)$$

$$\text{under unstable} : K_{zmin} = 0.01 \quad (6)$$

When the grid in the PBL was under stable conditions ( $Ri > 0$ ), the  $K_{zmin}$  value was set to the value calculated by formula 1. While the grid in the PBL was under unstable conditions ( $Ri < 0$ ), the  $K_{zmin}$  value was set to the default value (0.01). To avoid outlier calculation results, we set the  $K_{zmin}$  value variations from 0.01 to 2.0 (93% grid values fall within this interval). By comparing EXP\_BASE with EXP\_NEW, we can explore the impact of  $K_{zmin}$  on the  $PM_{2.5}$  simulation. We will also discuss the physical relationships of  $K_{zmin}$  with EF in section 3.2.

The manuscript may contain unclear descriptions in this paragraph. The turbulent diffusion coefficient  $K_h$  can be calculated following formula 3:  $K_h = K_m / Pr + K_{zmin}$ , where  $K_m$  is momentum mixing coefficient,  $Pr$  is the prandtl number.

The default value of the  $K_{zmin}$  in YSU PBL scheme is  $0.01 \text{ m}^2 \cdot \text{s}^{-1}$ . The aim of our work is to improve the simulation for the stable condition. Therefore, we only parameterized the  $K_{zmin}$  value during stable condition. While for the unstable, we let  $K_{zmin}$  consistent with the default setting ( $0.01 \text{ m}^2 \cdot \text{s}^{-1}$ ). In average, we find that the new adjusted  $K_h$  were  $1.35 \text{ m}^2 \cdot \text{s}^{-1}$  in NCP



and  $2.03 \text{ m}^2 \cdot \text{s}^{-1}$  in YRD, which are much lower than the  $K_h$  in daytime (bigger than  $3 \text{ m}^2 \cdot \text{s}^{-1}$ ). For example, the values of  $K_h$  in EXP\_BASE and EXP\_NEW in Nanjing ( $32.0^\circ\text{N}, 118.4^\circ\text{E}$ ) was shown in Figure R2. There is no  $K_h$  value at stable condition larger than that in unstable condition. We revised the text in line 134-138 of revised manuscript.

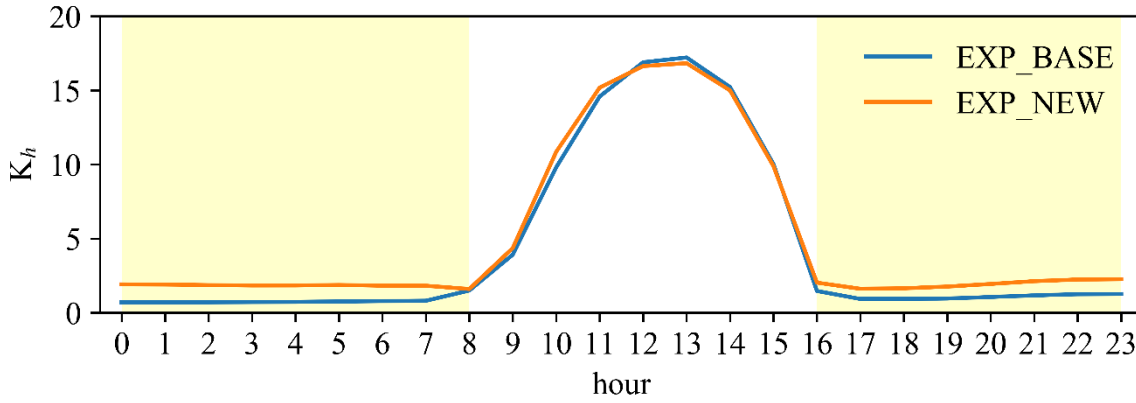

**Figure R2.** The turbulent diffusion coefficient in EXP\_NEW and EPX\_BASE (unit:  $\text{m}^2 \cdot \text{s}^{-1}$ ) in Nanjing. The yellow shaded represent the stable condition (Richardson number  $> 0$ ).

**In the last of our revised manuscript**

**Line 134-138**

... As such, we parameterized a new value of  $K_{zmin}$  in the PBL scheme in SBL based on the results of the sensitivity experiments that in EXP\_NEW, and the expression can be found in formula 5:

$$K_{zmin} = EF + 1.0 \quad (5)$$

When the grid was under stable conditions ( $Ri > 0$ ), the  $K_{zmin}$  value was set to the value calculated by formula 5. ...

**Comment 5:**

If some metrics are well known, please define them, including the IOA Index Of Agreement.

Thank you for this valuable suggestion. The definition of the metrics that we used was added in the revised supplement of line 10 to 17.

**In the last of our revised supplement:**

**Line 10-17:**

Mean Bias:  $MB = \frac{1}{N} \sum_{i=1}^N (M_i - O_i)$

Index Of Agreement:  $IOA = 1 - \frac{\sum_{i=1}^N (M_i - O_i)^2}{\sum_{i=1}^N (|M_i - \bar{M}| + |O_i - \bar{O}|)^2}$

Root Mean Square Error:  $RMSE = \sqrt{\frac{1}{N} \sum_{i=1}^N (M_i - O_i)^2}$

Correlation Coefficient:  $R = \frac{Cov(x,y)}{\sqrt{\bar{x}\bar{y}}}$

Normalized Mean Bias:  $NMB = \frac{\sum_{i=1}^N (M_i - O_i)}{\sum_{i=1}^N O_i} \times 100\%$

Normalized Mean Error:  $NME = \frac{\sum_{i=1}^N |M_i - O_i|}{\sum_{i=1}^N O_i} \times 100\%$

### Comment 6:

I.145: if the key point is an enhancement of  $K_{zmin}$  during the night, why not show time series of a few days, at a station with measurements and with hourly values, showing three to four consecutive days?

Thank you for this valuable suggestion. The simulation of four cities and the station information can be found in the answer of comment 3. There are three to four haze events (the concentration of  $PM_{2.5}$  exceeds  $115 \mu g \cdot m^{-3}$  and lasts for more than 48 hours) occurred in each city in December 2016. We found the new scheme obviously improve the overestimated of  $PM_{2.5}$ . The metrics such as MB and IOA has significant improvement in EXP\_NEW, especially the mean bias (MB). The value of MB decreased from  $59.68$  to  $5.33 \mu g \cdot m^{-3}$  for Zhengzhou, from  $81.54$  to  $13.32 \mu g \cdot m^{-3}$  for Jining, from  $58.11$  to  $37.27 \mu g \cdot m^{-3}$  for Hefei, from  $36.46$  to  $24.39 \mu g \cdot m^{-3}$  for Nanjing, respectively.

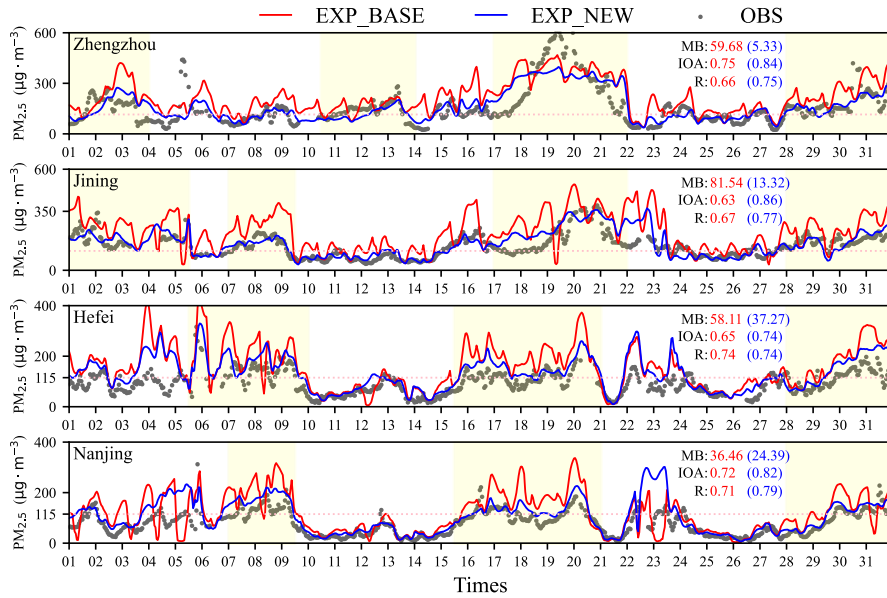

**Figure S2.** Time series of  $PM_{2.5}$  concentration in Zhengzhou, Jining, Hefei and Nanjing in December 2016. The grey dots, red lines and blue lines represent the results of observation, EXP\_BASE and EXP\_NEW, respectively. The yellow shaded represent haze events (the concentration of  $PM_{2.5}$  exceeds  $115 \mu g \cdot m^{-3}$  and lasts for more than 48 hours) in each city. The metrics (MB, IOA and R) was calculated by the full day (daytime and nighttime) data.

### Comment 7:

The Table shows that the bias for  $T_{2m}$  is  $-1.15$  degrees when the text says  $-0.86$  degrees. Please correct the correspondence between text and tables. And a bias of  $1.15$  degrees is not really good. There is perhaps a problem with the use of the WRF model, independently of the  $K_{zmin}$  parameterization studied in this paper.

>>Line 147: ... the MB mean value to be negative ( $-0.86 \text{ } ^\circ\text{C}$ ) ...

Thank you for this valuable suggestion. We apologize that there are some mistake in the manuscript. The mean bias for  $T_{2m}$  is  $-1.15^\circ\text{C}$ , which is not very good in the original model. While in our revised scheme, the mean bias have improved with a smaller MB value of  $T_{2m}$  ( $0.39^\circ\text{C}$ ?). We have revised the text in the revised manuscript of line 152.

The incorrect temperature simulations has also received scholarly attention. Chaouch et al. (2017) found a cold bias in the 2 m air temperature during the PBL collapse and at nighttime, reflecting an overestimation of the surface cooling rate. Udina et al. (2016) suggested that WRF-LES model calculated thermal coupling at the surface is unrealistically large. As a result, the rate difference between the molecular thermal conduction and the vertical eddy diffusion is underestimated, leading to the prediction of a lower air temperature near the cooling surface in simulations. It also leads to the formation of a more stable

boundary layer compared to the observations. In general, the simulation of temperature deserves further improvement.

**Reference:**

Chaouch, N., Temimi, M., Weston, M., & Ghedira, H. (2017). Sensitivity of the meteorological model WRF-ARW to planetary boundary layer schemes during fog conditions in a coastal arid region. *Atmospheric Research*, 187, 106-127.

Udina, M., Sun, J., Kosović, B., & Soler, M. R. (2016). Exploring vertical turbulence structure in neutrally and stably stratified flows using the weather research and forecasting–large-eddy simulation (WRF–LES) model. *Boundary-layer meteorology*, 161, 355-374.

**In the last of our revised manuscript in**

**Line 152:**

... the MB mean value to be negative (-1.15°C) ...

**Comment 8:**

l.165: the authors diagnosed a positive bias in PM<sub>2.5</sub> surface concentrations and conclude it is due to "geographical conditions, climate and emissions differences and the degree of pollution". It is not an in-depth analysis. Before tuning one parameter, it should be useful to perform some sensitivity tests in order to see if the bias is due to emissions, meteorology, transport, deposition of a mixing of all.

Thank you for this valuable suggestion. As you said, it is not an in-depth analysis that the positive bias in PM<sub>2.5</sub> surface concentrations is due to "geographical conditions, climate and emissions differences and the degree of pollution". The NCP is located in the temperate monsoon climate and is the largest plain area in China with drier soils. The YRD is located in the subtropical monsoon zone, which has a more complex topography and wetter soils (Han et al., 2020). There are also differences in the sources of sector emission in the two regions. Lu et al., (2023) study of the sectoral black carbon primary emissions in winter reveals that most of the BC in the North China Plain comes from residential sources, while the proportion of transportation and industrial emissions in YRD were comparable to the proportion of residential sources. We try to prove our claims as much as possible through sensitivity experiments. The effects of emission inject height was tested in the response to general comment 2. As shown in Tables R2, the relative bias of PM<sub>2.5</sub> between two region was different regardless of the emission inject height. Another set of sensitivity experiments was meteorology input dataset. The input meteorology were FNL (EXP\_BASE) and ERA5 (EXP\_ERA5). The simulations also show north-south differences. For nighttime or haze pollution, the atmosphere is usually stable and pollutant mainly comes from local emissions and the contribution of transport is smaller compared to vertical diffusion by our simulations. As such, we argue that transport is not primary responsible for the simulated PM<sub>2.5</sub> overestimation under stable conditions. For deposition, no previous study has reported that the model has significant bias in this module. In general, we prefer to attribute north-south modeling differences to meteorological(or climate) and geographic conditions and emission differences. Further sensitive experiments in meteorology, emission and deposition are necessary in future studies.

**Table R1.** Mean model performance metrics for and PM<sub>2.5</sub> (nighttime) in different experiment

| Case_name    | Region | MB    | IOA  | RMSE   | R    |
|--------------|--------|-------|------|--------|------|
| EXP_BASE     | NCP    | 57.99 | 0.76 | 89.32  | 0.73 |
|              | YRD    | 37.77 | 0.71 | 69.07  | 0.71 |
| EXP_height_2 | NCP    | 71.28 | 0.72 | 101.15 | 0.72 |
|              | YRD    | 49.16 | 0.67 | 80.86  | 0.71 |
| EXP_ERA5     | NCP    | 45.41 | 0.72 | 89.33  | 0.62 |
|              | YRD    | 29.42 | 0.73 | 62.11  | 0.66 |

## Reference

- Han, G., Wang, J., Pan, Y., Huang, N., Zhang, Z., Peng, R., ... & Pan, Z. (2020). Temporal and spatial variation of soil moisture and its possible impact on regional air temperature in China. *Water*, 12(6), 1807.
- Lu, W., Zhu, B., Liu, X., Dai, M., Shi, S., Gao, J., & Yan, S. (2023). The influence of regional transport on the three-dimensional distributions of black carbon and its sources over eastern China. *Atmospheric Environment*, 297, 119585.

### Comment 9:

l.177: What new PBL scheme? The new Kzmin formulation? or something else? This sentence seems out of place in the text.  
»Line 177: A new PBL scheme was introduced in EXP\_NEW and solved the overestimation in eastern China. ...

Thank you for this valuable suggestion. The PBL scheme is the YSU PBL scheme contain our new parameterized Kzmin. We have replaced it in the revised manuscript of line 183 to 184.

### In the last of our revised manuscript:

#### Line 183-184:

The revised dynamic Kzmin parameterization was introduced into YSU PBL scheme to solve the overestimation of PM<sub>2.5</sub> simulation in eastern China. ...

### Comment 10:

l.187: There is no quantified improvement but "we believe that the simulation in the YRD has also been improved." Please explain better.

»Line 186-188: ... Although there is no significant improvement in the mean MB in the YRD, the simulated trend is more similar to the observation. Therefore, we believe that the simulation in the YRD has also been improved. ...

Thanks. The significant imporvement is NCP relative to YRD (Figure S2). We revised the expression in the revised manuscript of line 193-194.

### In the last of our revised manuscript:

#### Line 193-194:

... Overall, the revised scheme shows enhanced simulation results in both two regions. While the improvement in the NCP is slightly more significant compared to that in the YRD. ...

### Comment 11:

Figure 4: Usually, measurements are with symbols and model outputs with lines. Profiles are very small and difficult to read.

Thank you for this valuable suggestion. In this study, The PM<sub>2.5</sub> concentrations were measured by an PDR-1500 fixed on an unmanned aerial vehicle (UAV) platform (about 10-20m resolution). The observation data is denser below 800m while there are 8 grids in model outputs bellow 800m. Therefore, we use the following symbols that simulated data is dot and observed data is line. The layer with the green dot is above the layer with the red dot. The red dot in the high altitude is due to the difference is not significant between two schemes. To make the image clearer, we increased the resolution of the image and redrew the Figure 4 in the revised manuscript.

Figure 4

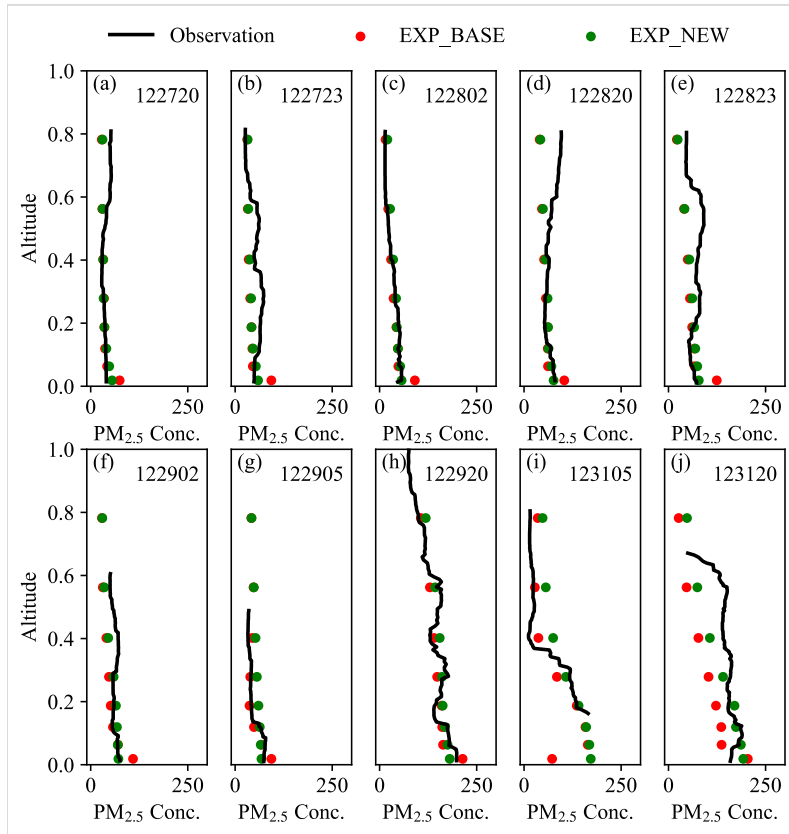

**Figure 4.** Model performance of  $PM_{2.5}$  (unit:  $\mu g \cdot m^{-3}$ ) in vertical direction. The black solid line represents the observation. The red and grey dot represents the simulation in EXP\_BASE and EXP\_NEW, respectively.

**Comment 12:**

The choice to have a maximum possible value of 2.0 is not a result but just an arbitrary threshold choice (l.135). Then on the map in Figure 5, some values may be larger than 2.0 (7% of the values).

»Line 135-136: To avoid outlier calculation results, we set the Kzmin value variations from 0.01 to 2.0 (93% grid values fall within this interval).

Thank you for this valuable suggestion. The setting of upper limit value of Kzmin was refer to the distribution of Kmzin which is calculate by fomula 5. We found that 2.3% of the Kzmin values were small than the default lower limit value (0.01); 93.9% of the Kzmin values were in the range of 0.01 to 2.0; 1.9% between 2.0 and 3.0; and only 1.9% lager than 3.0. Compared to the 0.01 to 2.0 interval (93.9%), only 1.9% of the Kzmin value were in the 2.0 to 3.0 interval. Table R2 give the model performances when upper limit of Kzmin set as 1.5, 2.0 and 3.0. We can find the model performance improve obviously when the Kzmin\_uplimit change from 1.5 to 2.0, while the improvement is not significant from 2.0 to 3.0. So, we finally set the upper limit of Kzmin as 2.0.

Table R2 Mean model performance metrics for and  $PM_{2.5}$  (nighttime) in different upper limit of Kzmin.

| Kzmin_upper limit | MB    | IOA  | RMSE  | R    |
|-------------------|-------|------|-------|------|
| <b>Set to 1.5</b> | 17.87 | 0.77 | 63.28 | 0.72 |
| <b>Set to 2.0</b> | 11.22 | 0.83 | 52.75 | 0.75 |
| <b>Set to 3.0</b> | 10.93 | 0.83 | 51.47 | 0.75 |

## In the last of our revised manuscript

### Line 139 to 141:

... To avoid unreasonably high Kzmin under stable condition, we set the upper/lower limit value of Kzmin as 2.0/0.01 (covering 93.9% grid values within 0.01-2.0, 2.3% smaller than 0.01). ...

### Comment 13:

l.220: "We need to use a larger Kzmin value to enhance turbulence under a strong stable atmosphere and small or no adjusted Kzmin values under a weak stable or neutral atmosphere." Here there is an explanation of the choice made for the new Kzmin. But there is no physical proof of this choice.

Thank you for your valuable suggestion. We realized that the sentence is not very exact. In the revised manuscript, we further analyze the relation between adjusted Kzmin (formula 5) and simulated PM<sub>2.5</sub> bias and try to give a reasonable physical proof. As shown in Figure 5, the new Kzmin scheme enhanced Kzmin values over eastern China, much larger than the default value of 0.01 m<sup>2</sup>·s<sup>-1</sup>. The distribution of the monthly averaged nocturnal Kzmin values exhibited a latitudinal difference with 0.88 m<sup>2</sup>·s<sup>-1</sup> (0.8-1.3 m<sup>2</sup>·s<sup>-1</sup>) in the NCP and 1.17 m<sup>2</sup>·s<sup>-1</sup> (1.0-1.5 m<sup>2</sup>·s<sup>-1</sup>) in the YRD, which is within the reasonable Kzmin ranges based on the sensitivity experiments in section 2.3 (Table S1). Also, in Figure R4, the PM<sub>2.5</sub> bias shows a nonlinear positive correlation with the Kzmin calculated by formula 5 in NCP and YRD. Most of Kzmin values (69%) in the NCP are less than 1, while most of Kzmin values (70%) in the YRD are greater than 1. The evidence indicated that the formula 5 is available to reflect the dependency of Kzmin on the landuse and the meteorology with a latitudinal effect. The latitudinal effect could relate to solar radiation, air temperature, cloud, precipitation and landuse in the 2 climate zones (Zhou et al., 2014, Jin et al., 2021) and in mostly extent can be expressed by formula 5. As such, the formula 5 can reasonable give the dynamic Kzmin values over east China in this study. We have added above sentences into the revise manuscript in line 231 to 236.

## Reference

Jin, H., Chen, X., Wu, P., Song, C., & Xia, W. (2021). Evaluation of spatial-temporal distribution of precipitation in mainland China by statistic and clustering methods. *Atmospheric Research*, 262, 105772.

Zhou, L. T., & Huang, R. (2014). Regional differences in surface sensible and latent heat fluxes in China. *Theoretical and applied climatology*, 116, 625-637.

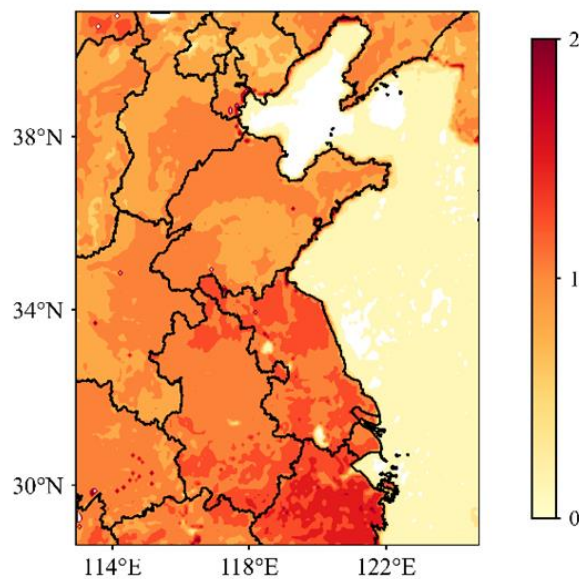

**Figure 5.** The distribution of Kzmin (unit: m<sup>2</sup>·s<sup>-1</sup>) in EXP\_NEW.

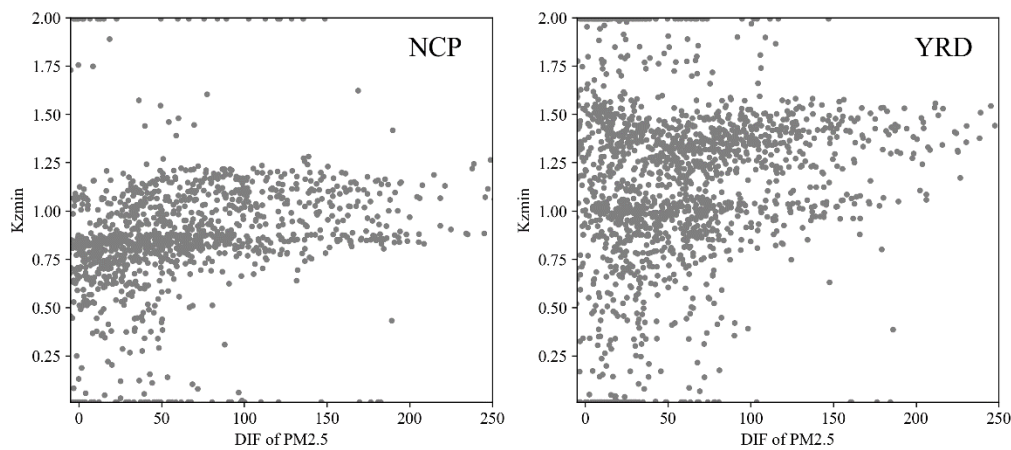

**Figure S4.** Scatter plots of the Kzmin and the bias of PM<sub>2.5</sub>.

### **In the last of our revised manuscript**

#### **Line 231 to 236**

Also, in Figure S4, the PM<sub>2.5</sub> bias shows a nonlinear positive correlation with the Kzmin calculated by formula 5 in NCP and YRD. Most of Kzmin values (69%) in the NCP are less than 1, while most of Kzmin values (70%) in the YRD are greater than 1. The evidence indicated that the formula 5 is available to reflect the dependency of Kzmin on the landuse and the meteorology with a latitudinal effect. The latitudinal effect could relate to solar radiation, air temperature, cloud, precipitation and landuse in the 2 climate zones (Zhou et al., 2014, Jin et al., 2021) and mostly extent can be expressed by formula 5. As such, the formula 5 can reasonable give the dynamic Kzmin values over east China in this study.

#### **Comment 14:**

I.223: Please use carefully the term 'climate' (not correct in the present context).

»Line 223-224: As such, EF can reflect thermal flux features related to climate and the underlying surface in different regions. ...

Thank you for this valuable suggestion. The NCP is located in the temperate monsoon climate and is the largest plain area in China with drier soils. The YRD is located in the subtropical monsoon zone, which has a more complex topography and wetter soils (Han et al., 2020). there are distinct features in meteorology/climate and geography, eg. solar radiation, air temperature, cloud, precipitation and landuse, which in mostly extent can be expressed by latent heat flux and sensible heat flux in formula 5 in the two regions (Zhou et al., 2014).

#### **Reference**

Han, G., Wang, J., Pan, Y., Huang, N., Zhang, Z., Peng, R., ... & Pan, Z. (2020). Temporal and spatial variation of soil moisture and its possible impact on regional air temperature in China. *Water*, 12(6), 1807.

Zhou, L. T., & Huang, R. (2014). Regional differences in surface sensible and latent heat fluxes in China. *Theoretical and applied climatology*, 116, 625-637.

**Comment 15:**

1.232: It is stated that: "As most primary pollutants are emitted to the first level in the model", it is not the case of many models. For example, in Europe, anthropogenic emissions are vertically distributed following a vertical profile proposed by EMEP. Fires and dust emissions are often injected following a vertical profile.

>> Line 232 ... As most primary pollutants are emitted to the first level in the model, ...

Thank you for pointing out the deficiencies in the description of the manuscript. In our study, the anthropogenic emission inventory that we used is MEIC (in China) and MIX (east of Asia that excluding China). Both MEIC and MIX are divided into five sector emission, including (power, residential, transport, residential and industry emission). According to the vertical profile suggestion by MEIC, residential, transport and residential emission was emitted to the first level in the model. For power emission, it was emitted from second level to seventh level (about 550m). For the industry emission, it was emitted from first level to third level (about 120m). The emission inject height of different sector source was shown in Figure R3a. All residential, transport, residential emission and 50 % industry emission are emitted to the first level. Figure R3b is the NO emission in Nanjing(32.0°N,118.4°E). From Figure R3b, we can find that about 83.52% NO was emitted to the first level in the model. There may be something wrong with the presentation of the manuscript. To avoid it, we have revised the text in the revised manuscript line 244.

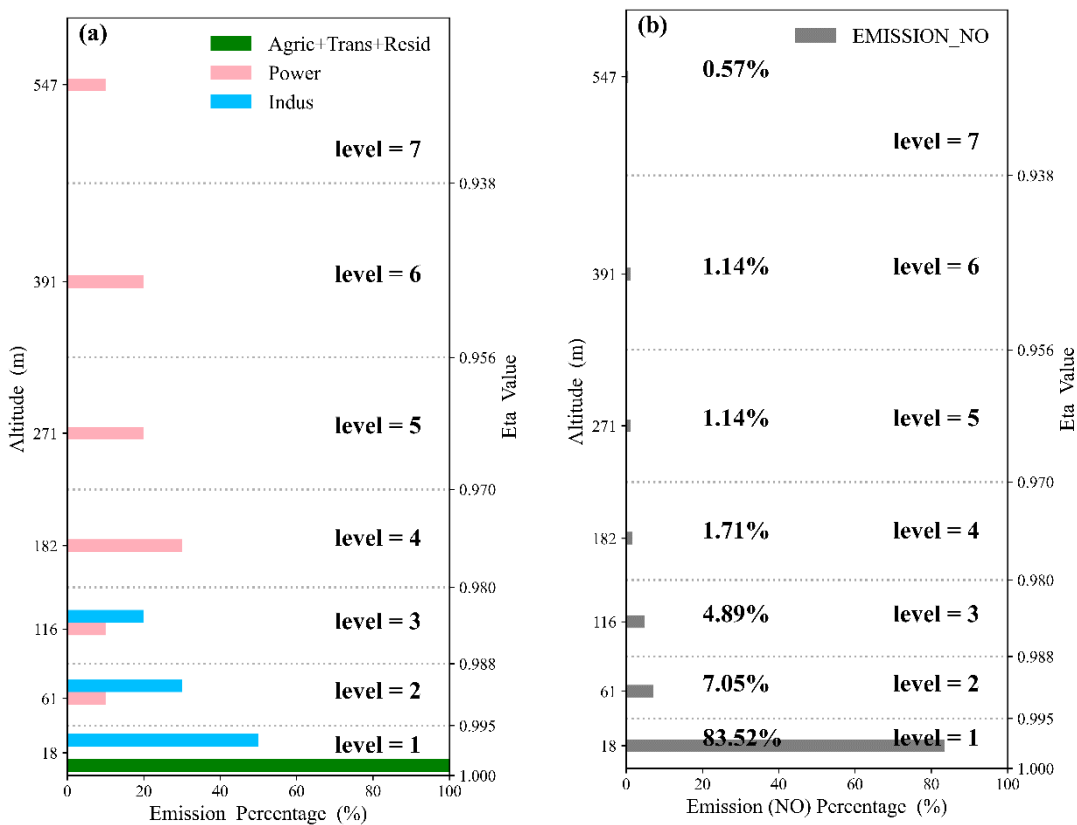

**Figure R3.** The emission percentage in this study. (a) different sector emission percentage, (b) NO emission percentage in Nanjing (32.0°N,118.4°E)

**In the last of our revised manuscript in**

**Line 244:**

... As **larger proportion** of primary pollutants are emitted to the first level in the model, ...



**Comment 16:**

In this study PM<sub>2.5</sub> have different origins. Can a sensitivity experiment diagnose what source (anthropogenic? fires? biogenic? dust? etc.) could be responsible of the observed bias close to the surface?

Thank you for this valuable suggestion. In this study, the input emission inventory are anthropogenic emission inventory (MEIC: in China, index year is 2016; MIX: east of Asia that excluding China, index year 2010) and MEGAN biogenic emission inventory. Fires and dust emissions have not added because there were no significant 2 kind cases occurred in this study period after we checked. We have set two experiment to calculated the contribution of biogenic emission. The result showed that biogenic emission contributed less to the PM<sub>2.5</sub> concentration. When the anthropogenic emissions inventory is up to date (MEIC, December in 2016) in this study, the incorrect simulation of meteorological field could be responsible of the observed bias.

**Table R1.** Mean model performance metrics for and PM<sub>2.5</sub> (nighttime).

| Case_name     | MB    | IOA  | RMSE  | R    |
|---------------|-------|------|-------|------|
| With Megan    | 48.23 | 0.72 | 82.68 | 0.66 |
| Without Megan | 47.89 | 0.72 | 82.17 | 0.66 |
